# Supplementary figures and images for: PSMC analysis of effective population sizes in molecular ecology and its application to black‐and‐white Ficedula flycatchers
Source: PubMed Central journal article supplement — Mol Ecol. 2016 Feb 15;25(5):1058–72. doi: 10.1111/mec.13540 (PMC4793928; doi:10.1111/mec.13540), 2016-02-15

# Collared flycatcher (Italy)

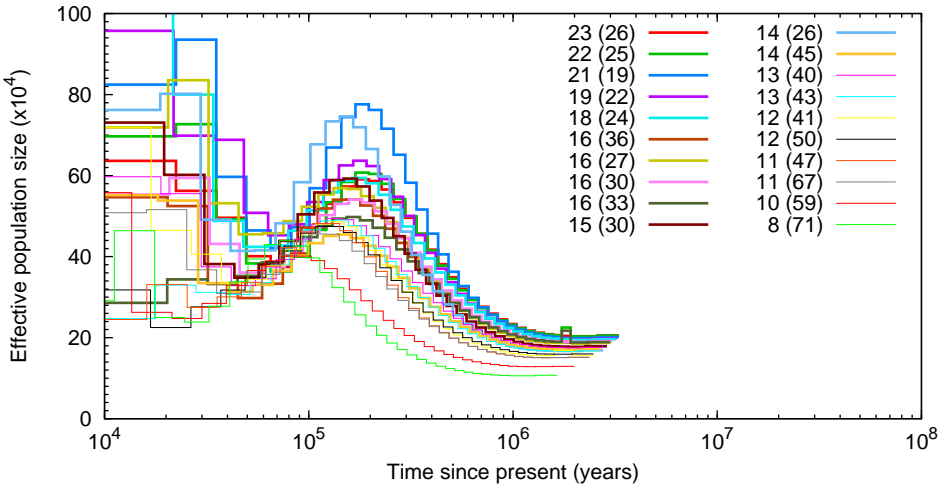

Supplement: MEC-25-1058-s002.pdf [file MEC-25-1058-s002.pdf]

# Collared flycatcher (Hungary)

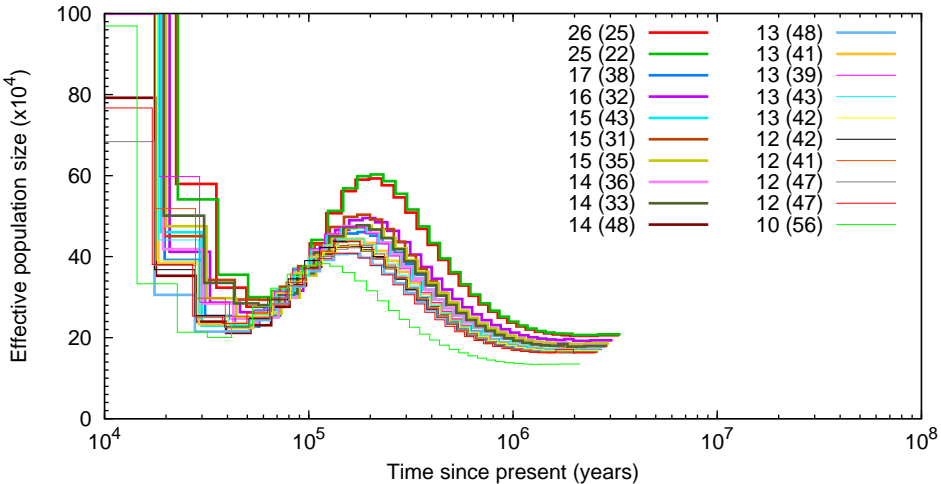

Supplement: MEC-25-1058-s003.pdf [file MEC-25-1058-s003.pdf]

# Pied flycatcher (Spain)

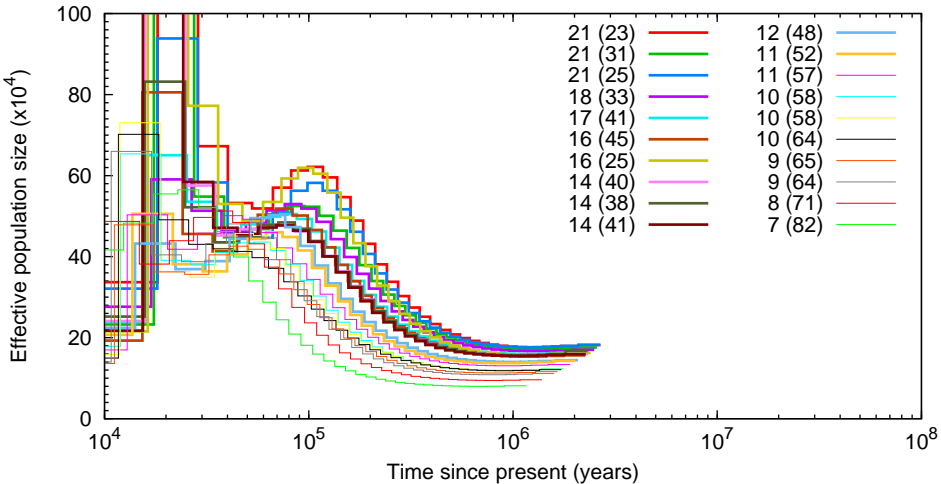

Supplement: MEC-25-1058-s005.pdf [file MEC-25-1058-s005.pdf]

# Pied flycatcher (Sweden)

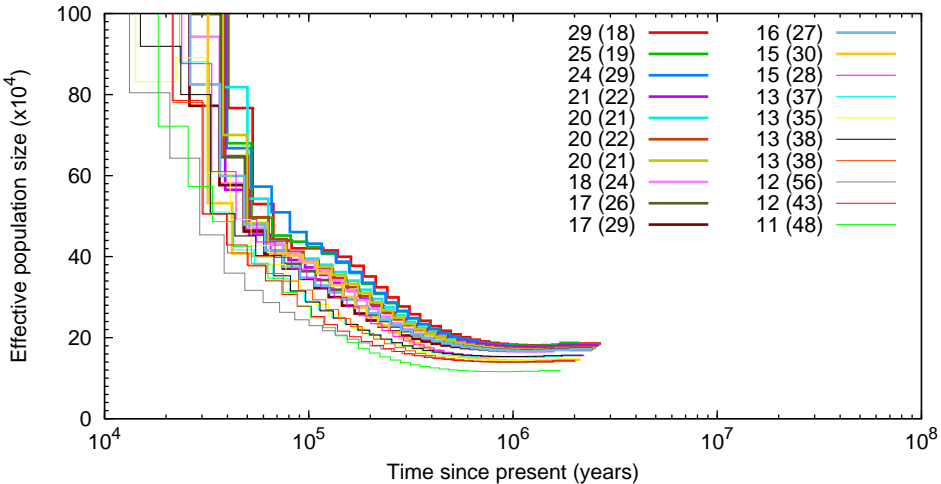

Supplement: MEC-25-1058-s006.pdf [file MEC-25-1058-s006.pdf]

# Pied flycatcher (Czech Republic)

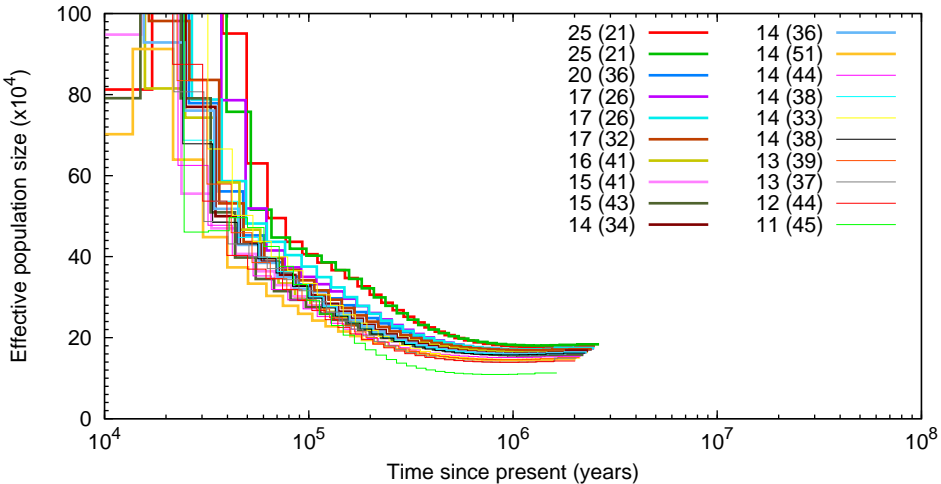

Supplement: MEC-25-1058-s007.pdf [file MEC-25-1058-s007.pdf]

# Atlas flycatcher

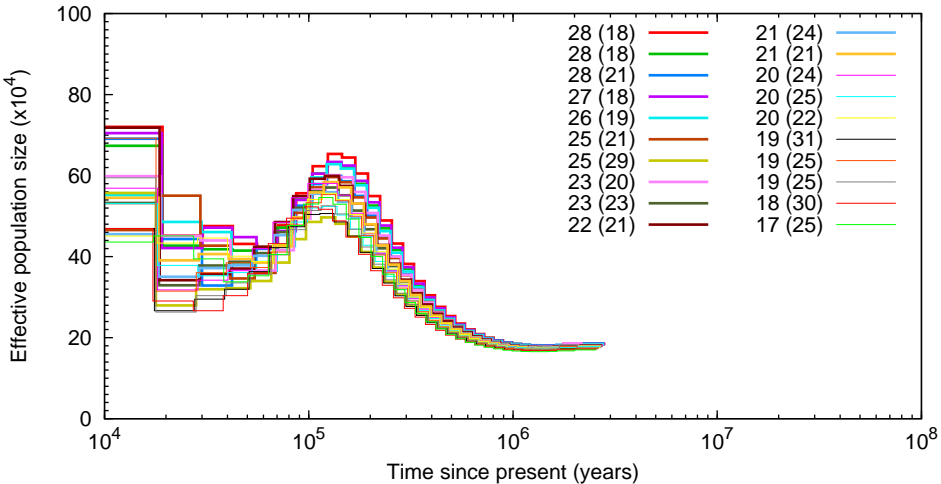

Supplement: MEC-25-1058-s009.pdf [file MEC-25-1058-s009.pdf]

# Semicollared flycatcher

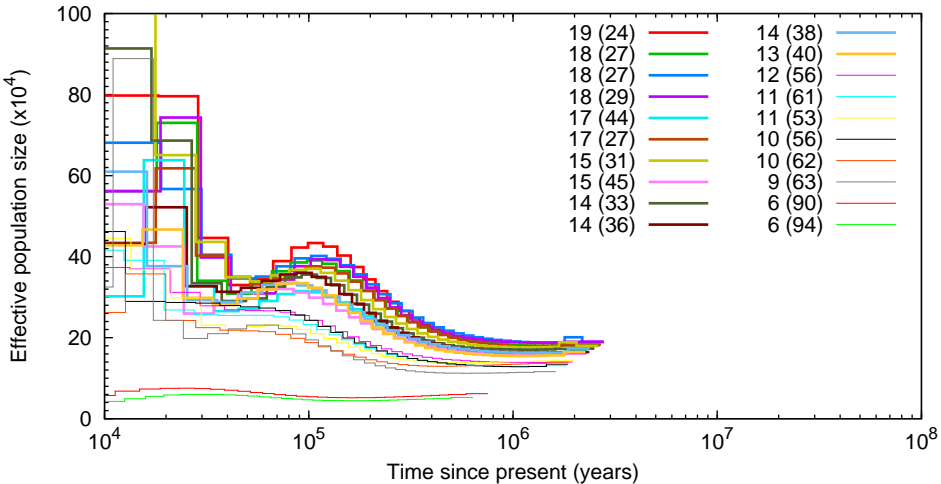

Supplement: MEC-25-1058-s010.pdf [file MEC-25-1058-s010.pdf]

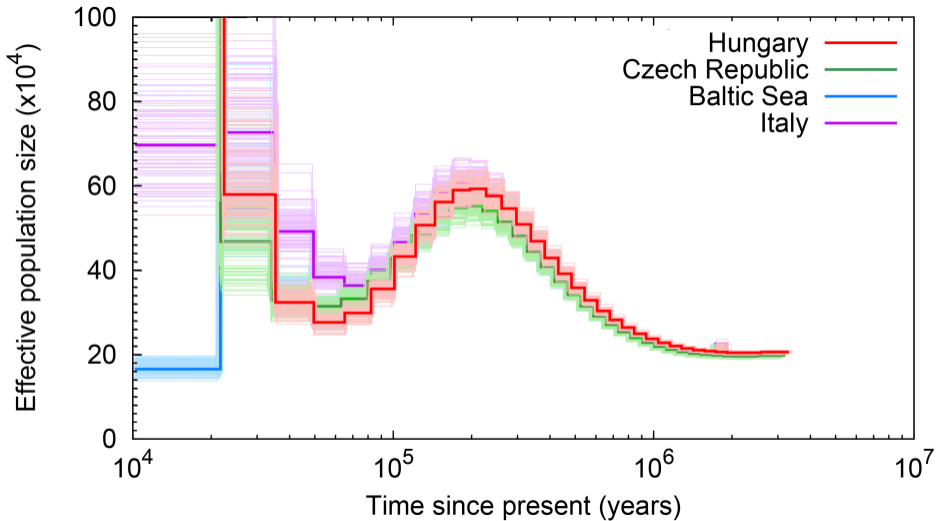

Supplement: MEC-25-1058-s011.pdf [file MEC-25-1058-s011.pdf]

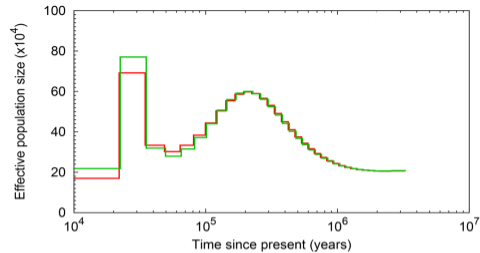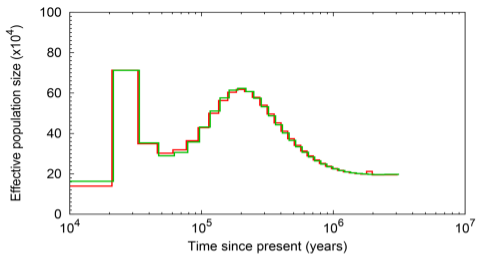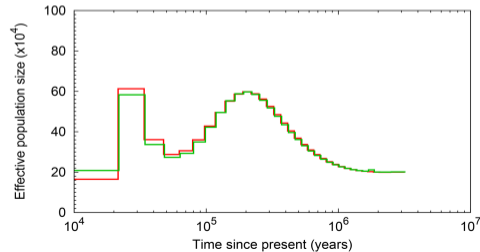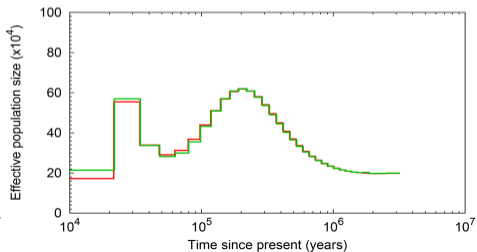

Supplement: MEC-25-1058-s012.pdf [file MEC-25-1058-s012.pdf]

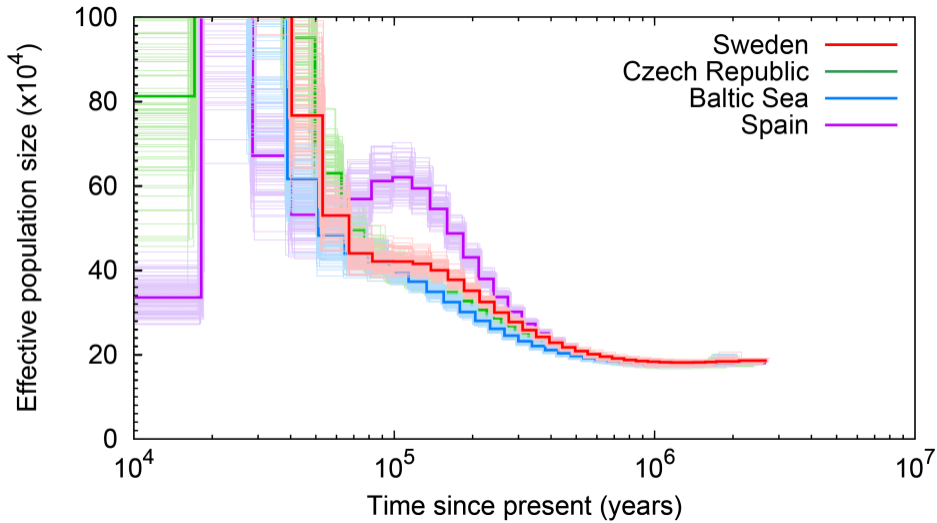

Supplement: MEC-25-1058-s013.pdf [file MEC-25-1058-s013.pdf]
